# Supplementary material
Source: PubMed Central journal article supplement (PMC3102551)
Supplement: supp_mol.110.070847_Suppl.fig2_mol_pharm031411.pdf [file supp_mol.110.070847_Suppl.fig2_mol_pharm031411.pdf]

**Title:** G-protein coupled receptor heteromerization: A role in allosteric modulation of ligand-mediated receptor binding

**Authors:** Ivone Gomes, Adriaan P. IJzerman, Kai Ye, Emeline L. Maillet, Lakshmi A. Devi

**Journal:** Molecular Pharmacology

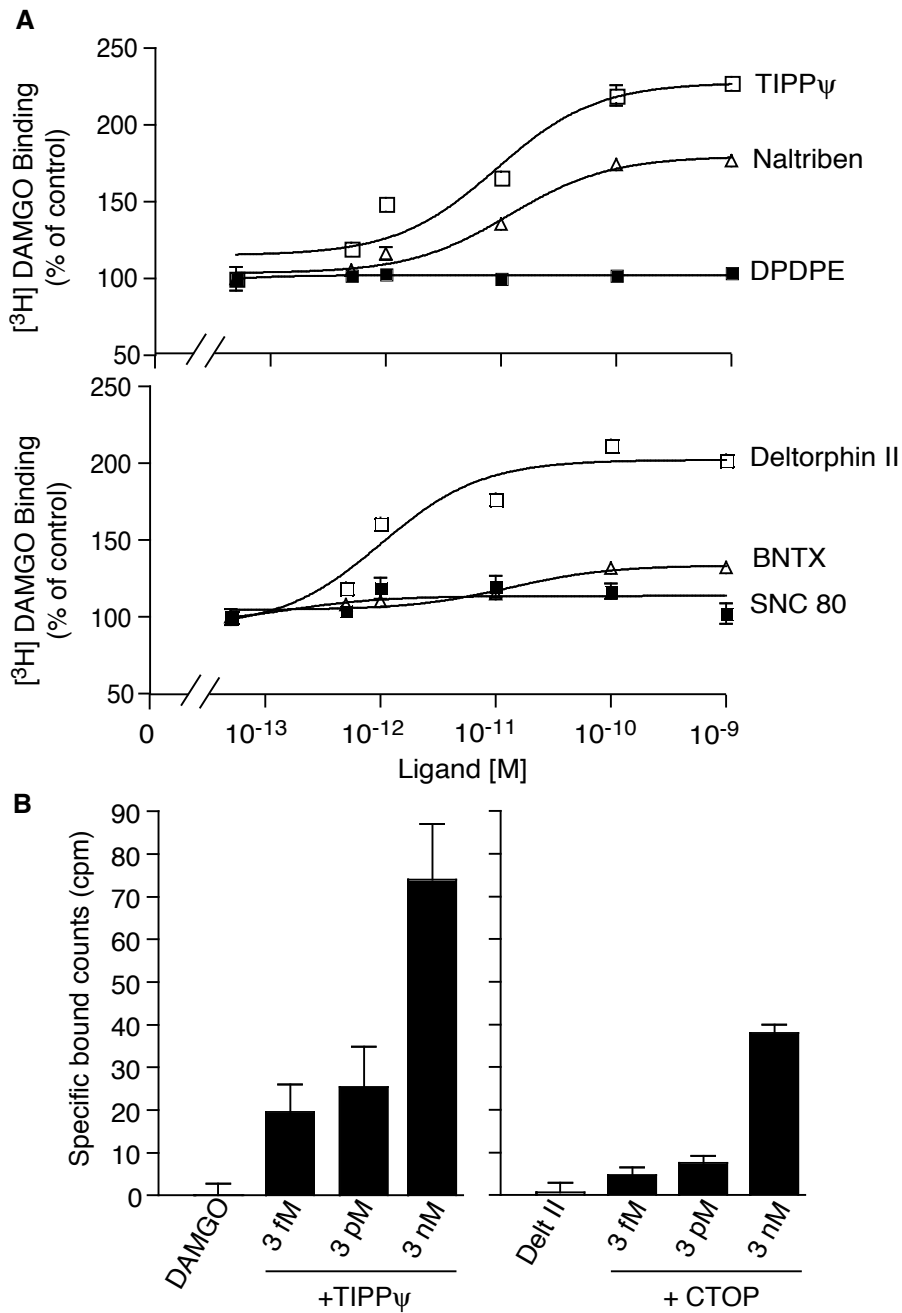

**Supplemental Figure 2.** Concentration-dependent enhancement by  $\delta$ OR ligands of [ $^3$ H]DAMGO binding. **(A)** CHO whole cells co-expressing  $\mu$ OR and  $\delta$ OR in a ratio of 1:4 were incubated with [ $^3$ H]DAMGO (10 nM) in the absence or presence of different concentrations (0-1 nM) of either TIPP $\psi$ , naltriben, BNTX, SNC80 or Deltorphin II and ligand binding was determined as described in Materials and Methods. **(B)** CHO whole cells co-expressing  $\mu$ OR- $\delta$ OR in a ratio of 1:4 were incubated with [ $^3$ H]DAMGO (3 pM) in the absence or presence of TIPP $\psi$  (3 fM, 3 pM and 3 nM) or with [ $^3$ H]Deltorphin II (3 pM) in the absence or presence of CTOP (3 fM, 3 pM and 3 nM). Data represent Mean  $\pm$  SEM (n=3).
