# Supplementary material
Source: PubMed Central journal article supplement (PMC3102551)
Supplement: supp_mol.110.070847_suppl_fig_1mol_pharm_031511.pdf [file supp_mol.110.070847_suppl_fig_1mol_pharm_031511.pdf]

**Title:** G-protein coupled receptor heteromerization: A role in allosteric modulation of ligand-mediated receptor binding  
**Authors:** Ivone Gomes, Adriaan P. IJzerman, Kai Ye, Emeline L. Mailliet, Lakshmi A. Devi  
**Journal:** Molecular Pharmacology

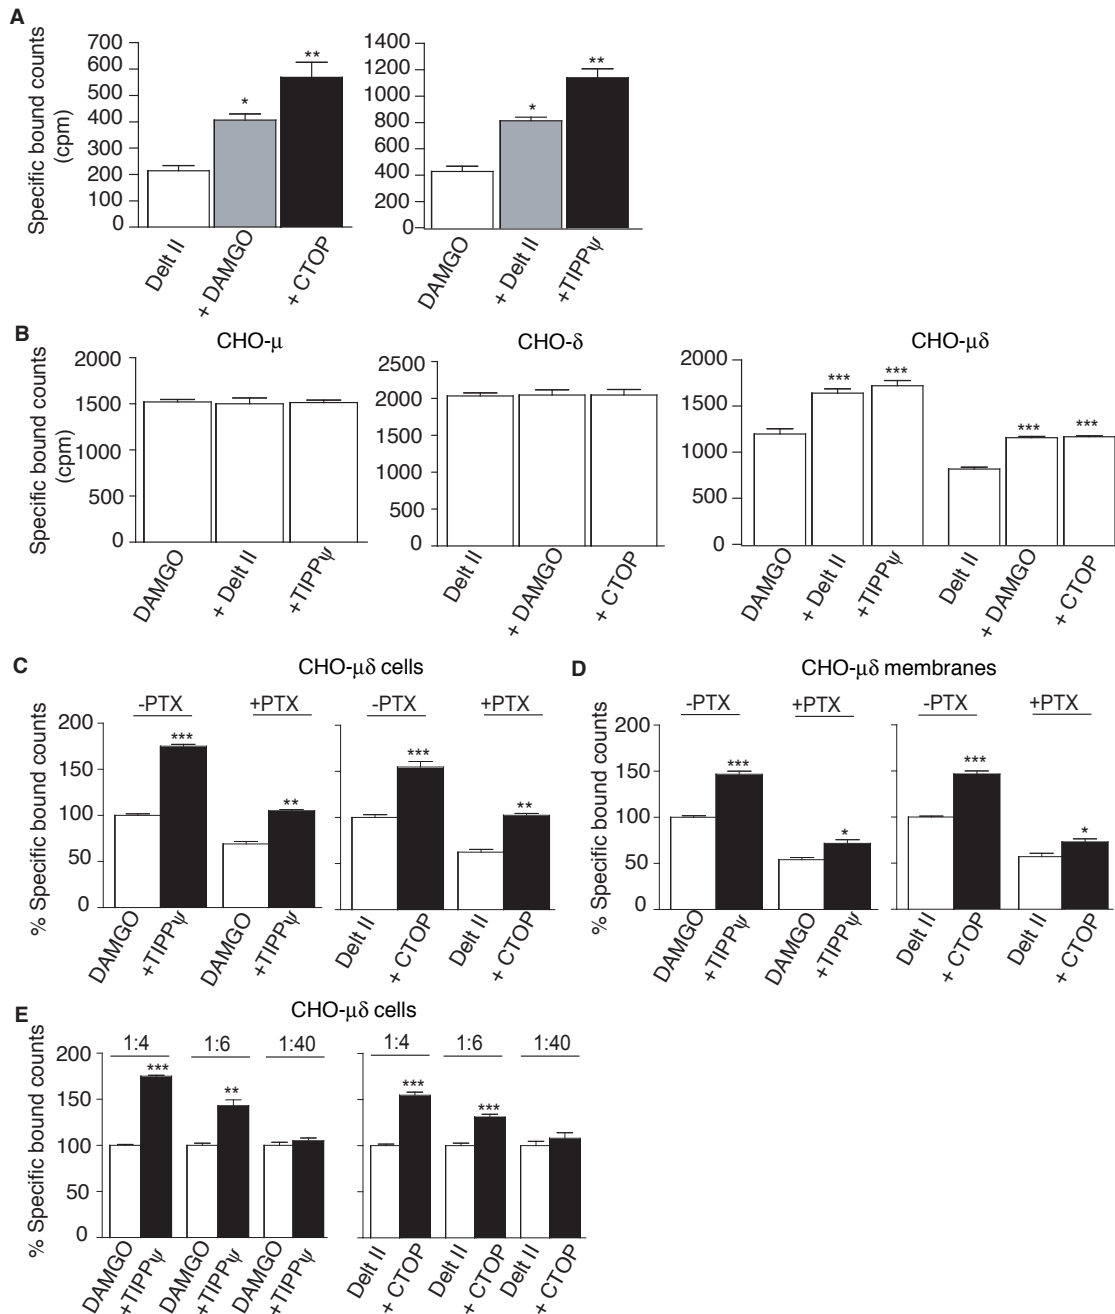

**Supplemental Figure 1.** Binding properties of  $\mu$ OR- $\delta$ OR heteromers. Membranes from SK-N-SH cells that endogenously express  $\mu$ OR- $\delta$ OR heteromers (2:1 ratio) (A), from CHO cells expressing either  $\mu$ OR,  $\delta$ OR or co-expressing  $\mu$ OR- $\delta$ OR (B) were incubated with [ $^3$ H]Deltorphan II (10 nM) in the absence or presence of 10 nM of either DAMGO, or CTOP or with [ $^3$ H]DAMGO (10 nM) in the absence or presence of 10 nM of either Deltorphan II (Delt II) or TIPP $\psi$  as described in Materials and Methods. (C & D) Whole cells (C) or membranes (D) from CHO cells co-expressing  $\mu$ OR- $\delta$ OR were pre-treated with pertussis toxin as described in Methods and used for binding assays as described above. (E) Binding assays as described above were carried out with CHO whole cells co-expressing  $\mu$ OR- $\delta$ OR in a ratio of 1:4, 1:6 and 1:40. Data represent Mean  $\pm$  SEM (n=3). \*p<0.05; \*\*p<0.01; \*\*\*p<0.001.
